# Supplementary material for: Coinage metal-ethylene complexes of sterically demanding 1,10-phenanthroline ligands
Source: Royal Society of Chemistry journal article supplement (doi:10.1039/d4dt00822g), 2024-01-01
Supplement: d4dt00822g1.pdf [file d4dt00822g1.pdf]

## **Coinage metal-ethylene complexes of sterically demanding 1,10-phenanthroline ligands**

Deepika V. Karade, Vo Quang Huy Phan, H. V. Rasika Dias\*

*Department of Chemistry and Biochemistry, The University of Texas at Arlington,  
Box 19065, Arlington, Texas 76019-0065, United States*

### **Supplementary Information**

**Table S1.** Selected peaks from  $^1\text{H}$  and  $^{13}\text{C}$  NMR for complexes **1-4** and several related in the literature. The chemical shift ( $\Delta\delta$ ) from free ethylene represents  $\Delta\delta = \delta$  (metal complex) –  $\delta$  (free ethylene). For comparison, free ethylene has chemical shifts of  $\delta$  5.40 ( $^1\text{H}$ ) and 123.1 ( $^{13}\text{C}$ ) ppm in  $\text{CDCl}_3$ . <sup>a</sup>Data acquired at  $-90^\circ\text{C}$ .

| Compound                                                                                     | $\delta_{\text{H}}$ ( $\text{H}_2\text{C}=\text{)$<br>(ppm) | $\Delta\delta_{\text{H}}$<br>(ppm) | $\delta_{\text{C}}$ ( $\text{H}_2\text{C}=\text{)$<br>(ppm) | $\Delta\delta_{\text{C}}$<br>(ppm) | Ref.      |
|----------------------------------------------------------------------------------------------|-------------------------------------------------------------|------------------------------------|-------------------------------------------------------------|------------------------------------|-----------|
| Free ethylene                                                                                | 5.40                                                        | -                                  | 123.1                                                       | -                                  |           |
| <sup>a</sup> Free ethylene                                                                   | 5.44                                                        | -                                  | -                                                           | -                                  | 1         |
| <b>[L1Cu(C<sub>2</sub>H<sub>4</sub>)]<sup>+</sup></b>                                        | 3.23                                                        | -2.17                              | 86.21                                                       | -36.89                             | This work |
| <b>[L1Ag(C<sub>2</sub>H<sub>4</sub>)]<sup>+</sup></b>                                        | 3.50                                                        | -1.90                              | 101.92                                                      | -21.18                             | This work |
| <b>[L1Au(C<sub>2</sub>H<sub>4</sub>)]<sup>+</sup></b>                                        | 2.34                                                        | -3.04                              | 61.08                                                       | -62.02                             | This work |
| <b>[L2Cu(C<sub>2</sub>H<sub>4</sub>)]<sup>+</sup></b>                                        | 3.53                                                        | -1.87                              | -                                                           | -                                  | This work |
| <sup>a</sup> [(5-Clphen)Cu(C <sub>2</sub> H <sub>4</sub> )] <sup>+</sup>                     | 5.34                                                        | -0.1                               | -                                                           | -                                  | 1         |
| <sup>a</sup> [(phen)Cu(C <sub>2</sub> H <sub>4</sub> )] <sup>+</sup>                         | 5.02                                                        | -0.42                              | -                                                           | -                                  | 1         |
| <sup>a</sup> [(2,9-Me <sub>2</sub> phen)Cu(C <sub>2</sub> H <sub>4</sub> )] <sup>+</sup>     | 4.92                                                        | -0.52                              | -                                                           | -                                  | 1         |
| <sup>a</sup> [(3,4,7,8-Me <sub>4</sub> phen)Cu(C <sub>2</sub> H <sub>4</sub> )] <sup>+</sup> | 4.72                                                        | -0.72                              | -                                                           | -                                  | 1         |
| <sup>a</sup> [(4,7-Me <sub>2</sub> phen)Cu(C <sub>2</sub> H <sub>4</sub> )] <sup>+</sup>     | 4.89                                                        | -0.55                              | -                                                           | -                                  | 1         |
| [(phen)Au(C <sub>2</sub> H <sub>4</sub> )] <sup>+</sup>                                      | 3.97                                                        | -1.43                              | 61.91                                                       | -61.03                             | 2         |
| [(2,9- <i>n</i> -Bu <sub>2</sub> phen)Au(C <sub>2</sub> H <sub>4</sub> )] <sup>+</sup>       | 3.88                                                        | -1.52                              | 60.60                                                       | -62.5                              | 2         |

**Table S2.** Selected bond distances (Å) and angles (°) for [L1M(C<sub>2</sub>H<sub>4</sub>)] [SbF<sub>6</sub>] (M = Cu (1), Ag (2), Au (3)) and [L2Cu(C<sub>2</sub>H<sub>4</sub>)] [BARF] (4). <sup>a</sup>There are two chemically identical molecules in the asymmetric unit. Metrical parameters of the second molecules are given in *italics*. <sup>b</sup>Sum of the angles at the metal ion.

| Complex                                                                                             | C=C<br>(Å)       | M-N<br>(Å)                         | M-C<br>(Å)                         | ∠NMN<br>(°)      | ∠CMC<br>(°)      | ∑ at<br>M <sup>b</sup><br>(°) | Ref.         |
|-----------------------------------------------------------------------------------------------------|------------------|------------------------------------|------------------------------------|------------------|------------------|-------------------------------|--------------|
| [L1Cu(C <sub>2</sub> H <sub>4</sub> )] <sup>+</sup>                                                 | 1.364(6)         | 2.011(2),<br>2.013(2)              | 2.027(3)<br>2.024(3)               | 83.90(10)        | 39.34(16)        | 360.1                         | This work    |
| [L1Ag(C <sub>2</sub> H <sub>4</sub> )] <sup>+</sup>                                                 | 1.326(4)         | 2.2843(15)<br>2.2842(15)           | 2.283(2)<br>2.283(2)               | 73.42(8)         | 33.77(11)        | 360                           | This work    |
| <sup>a</sup> [L1Au(C <sub>2</sub> H <sub>4</sub> )] <sup>+</sup>                                    | 1.394(5)         | 2.208(3)<br>2.214(3)               | 2.099(4)<br>2.112(3)               | 75.31(10)        | 38.99(15)        | 360.1                         | This work    |
|                                                                                                     | <i>1.405(5)</i>  | <i>2.206(3)</i><br><i>2.216(3)</i> | <i>2.099(4)</i><br><i>2.112(3)</i> | <i>75.15(11)</i> | <i>38.66(15)</i> | <i>360.0</i>                  |              |
| [L2Cu(C <sub>2</sub> H <sub>4</sub> )] <sup>+</sup>                                                 | 1.339(3)         | 2.0059(14)<br>2.0179(14)           | 2.024(2)<br>2.0011(19)             | 83.59(6)         | 38.86(9)         | 360.6                         | This work    |
| [(phen)Cu(C <sub>2</sub> H <sub>4</sub> )] <sup>+</sup>                                             | 1.36(2)          | 2.002(8)<br>2.004(9)               | 1.998(13)<br>2.022(12)             | 85.6(3)          | 39.6(6)          | 360                           | <sup>3</sup> |
| <sup>a</sup> [(2,9- <i>n</i> -Bu <sub>2</sub> phen)Au(C <sub>2</sub> H <sub>4</sub> )] <sup>+</sup> | 1.383(8)         | 2.192(5)<br>2.196(5)               | 2.086(6)<br>2.096(7)               | 76.29(18)        | 38.6(2)          | 360                           | <sup>2</sup> |
|                                                                                                     | <i>1.411(10)</i> | <i>2.201(5)</i><br><i>2.189(5)</i> | <i>2.104(7)</i><br><i>2.106(7)</i> | <i>76.61(18)</i> | <i>39.2(3)</i>   | <i>360</i>                    |              |

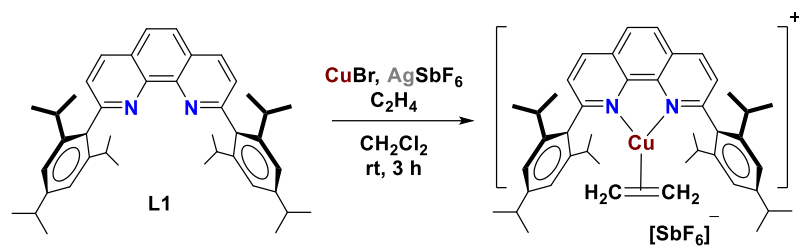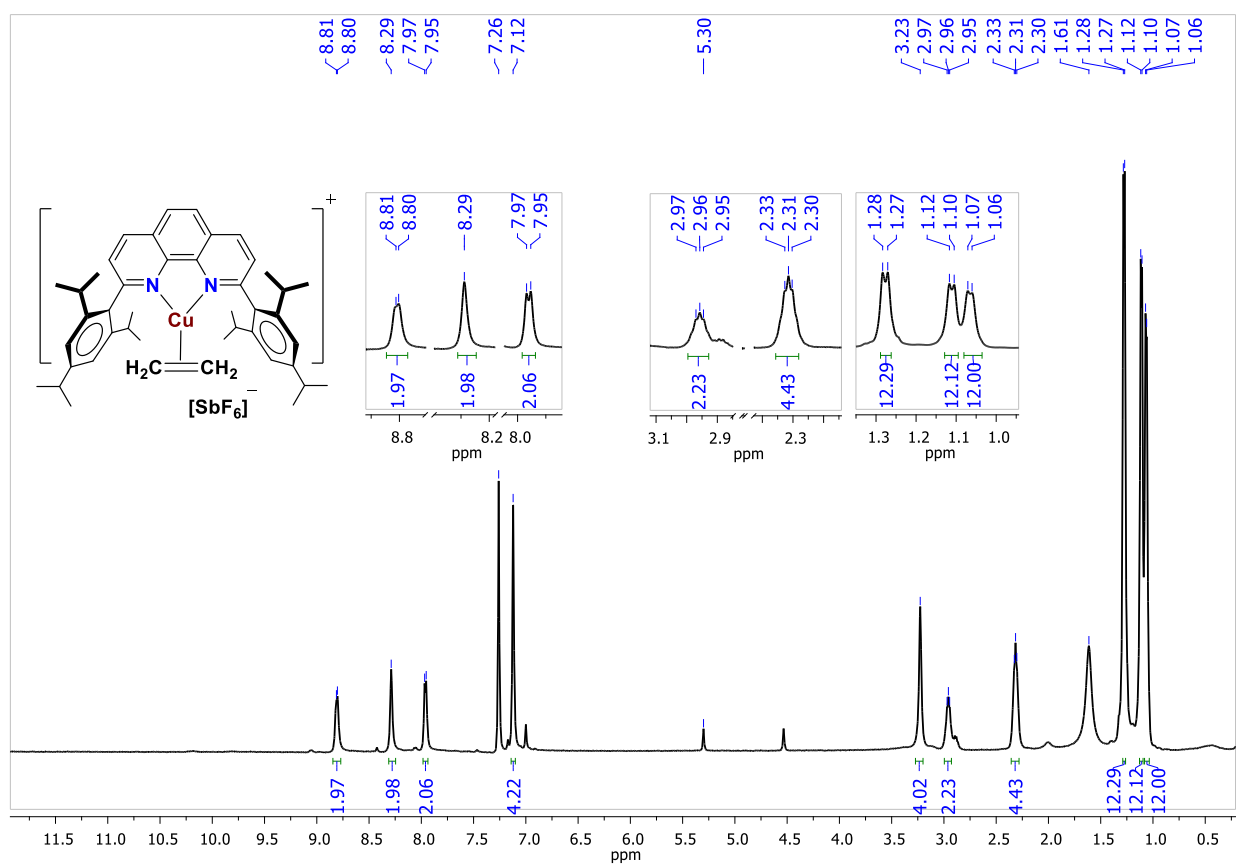

**Figure S1.**  $^1\text{H}$  NMR spectrum of  $[\text{L1Cu}(\text{C}_2\text{H}_4)][\text{SbF}_6]$  (1) in  $\text{CDCl}_3$

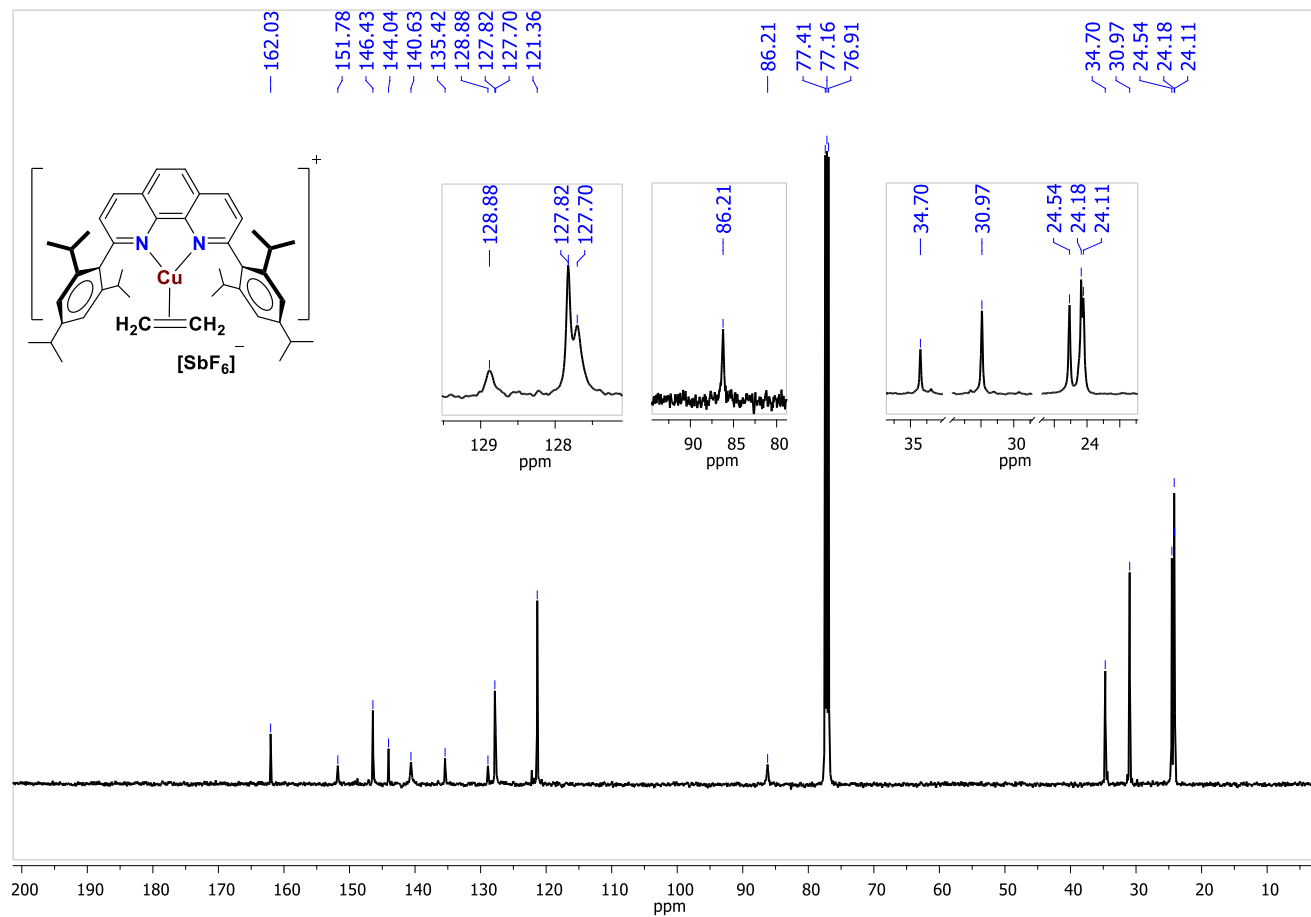

**Figure S2.**  $^{13}C\{^1H\}$  NMR spectrum of  $[L1Cu(C_2H_4)][SbF_6]$  (1) in  $CDCl_3$

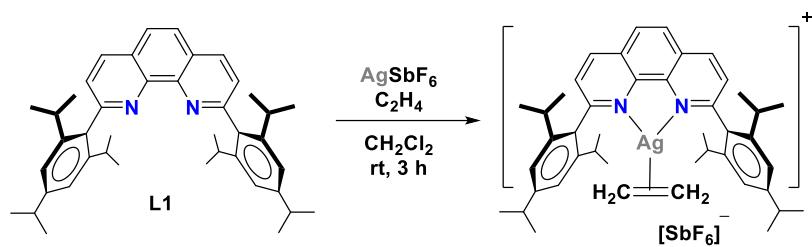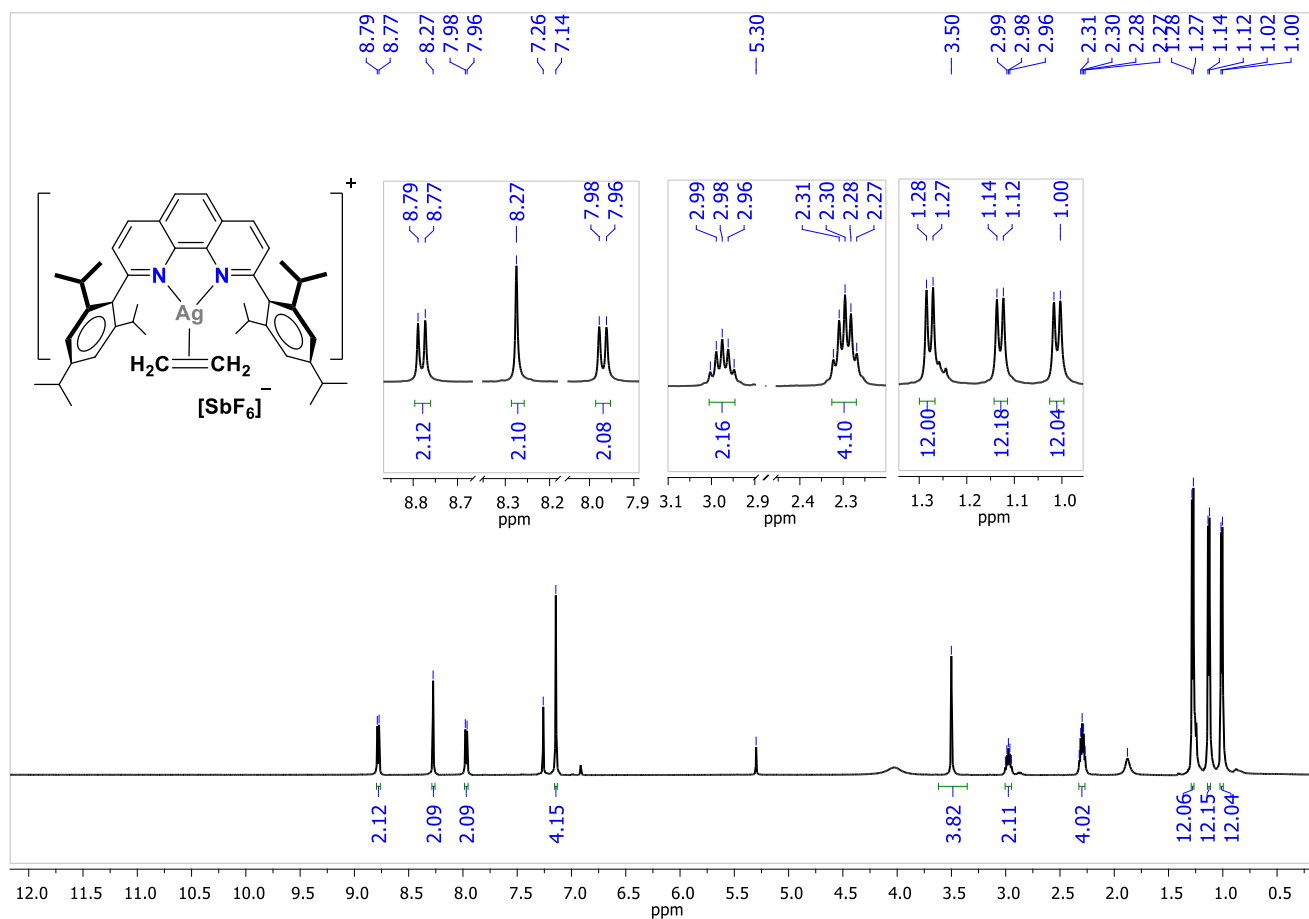

**Figure S3.**  $^1\text{H}$  NMR spectrum of  $[\text{L1Ag}(\text{C}_2\text{H}_4)][\text{SbF}_6]$  (**2**) in  $\text{CDCl}_3$

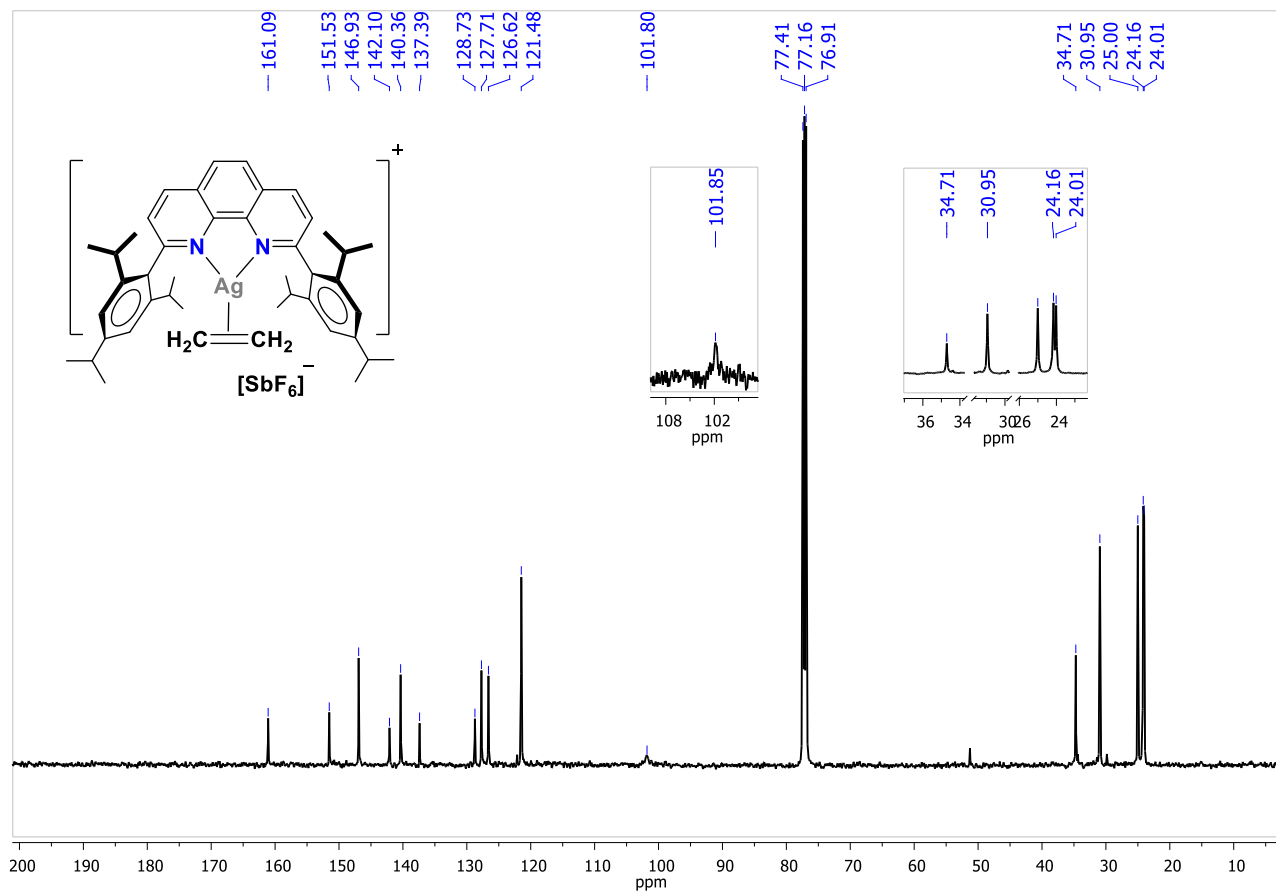

**Figure S4.**  $^{13}C\{^1H\}$  NMR spectrum of  $[L1Ag(C_2H_4)][SbF_6]$  (**2**) in  $CDCl_3$

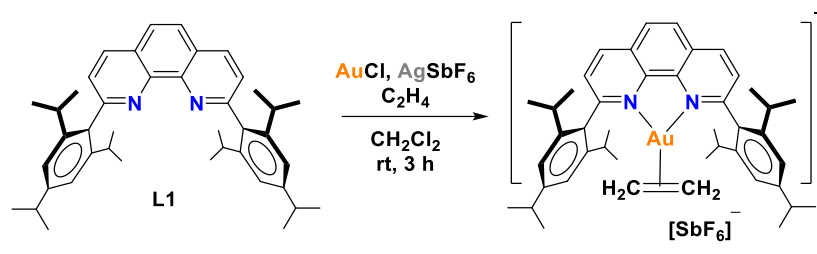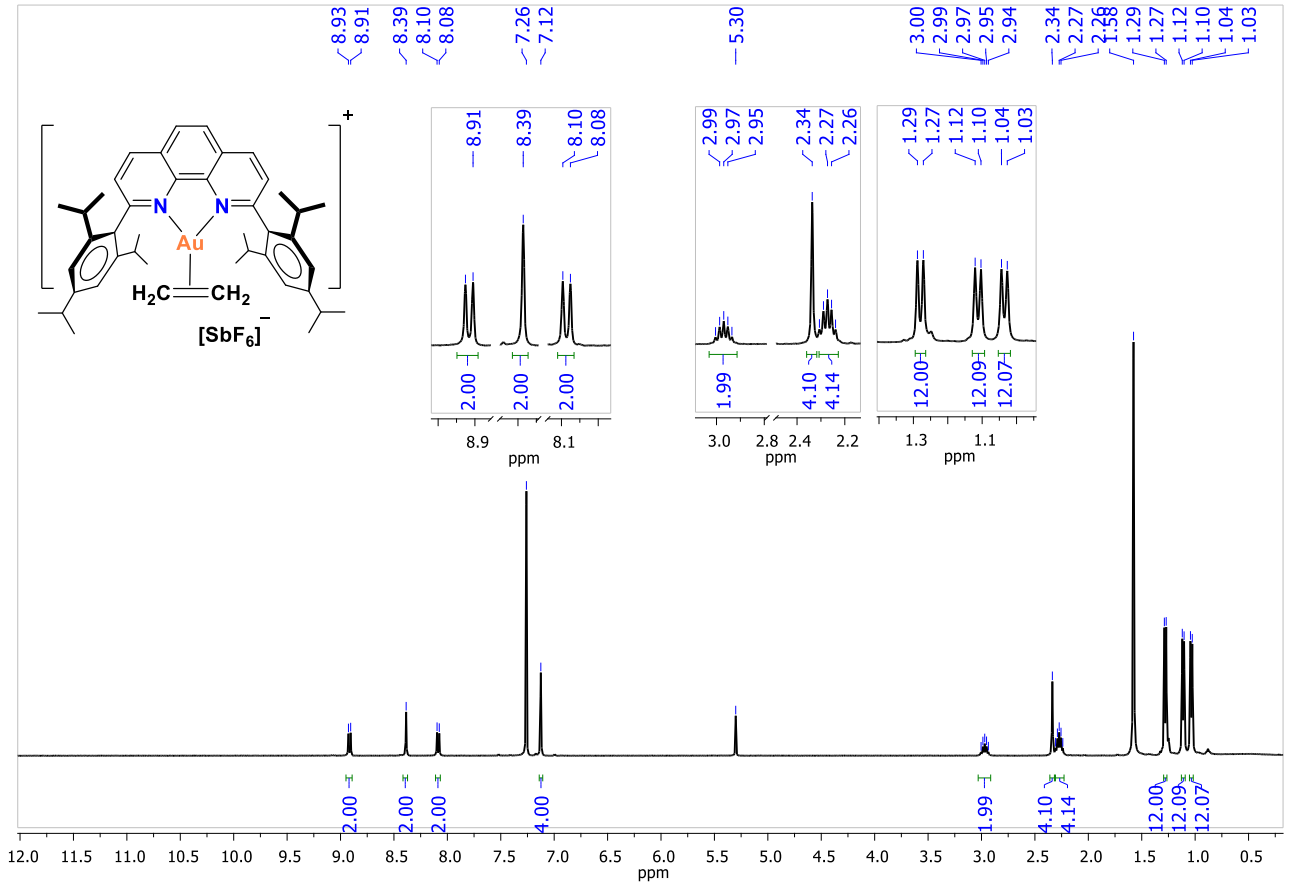

Figure S5.  $^1\text{H NMR}$  spectrum of  $[\text{L1Au}(\text{C}_2\text{H}_4)]^+ [\text{SbF}_6]^-$  (**3**) in  $\text{CDCl}_3$



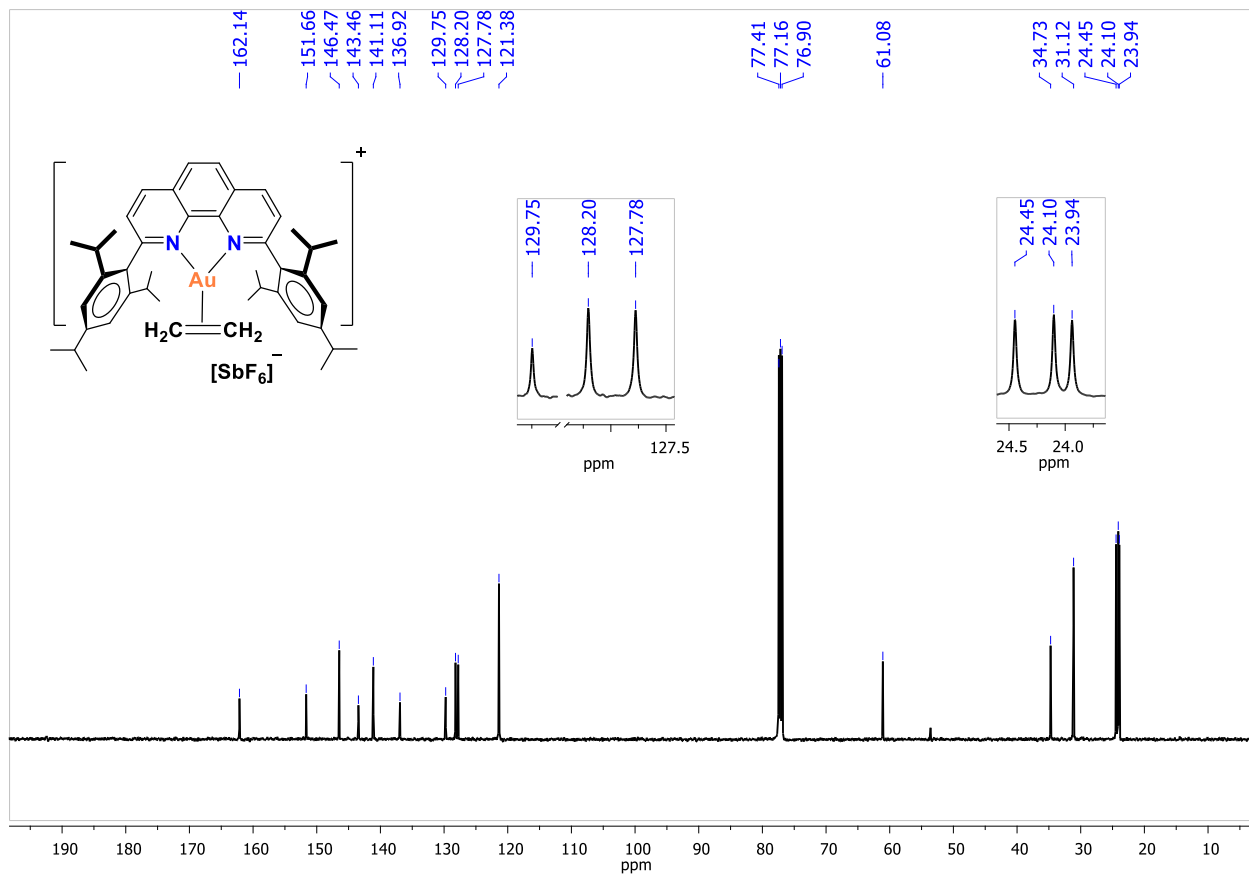

**Figure S6.**  $^{13}C\{^1H\}$  NMR spectrum of  $[L1Au(C_2H_4)][SbF_6]$  (**3**) in  $CDCl_3$

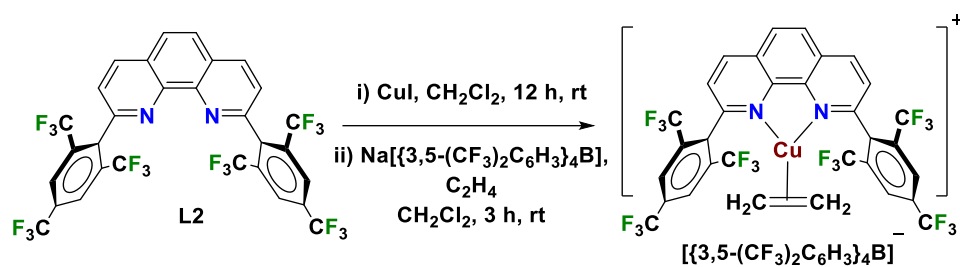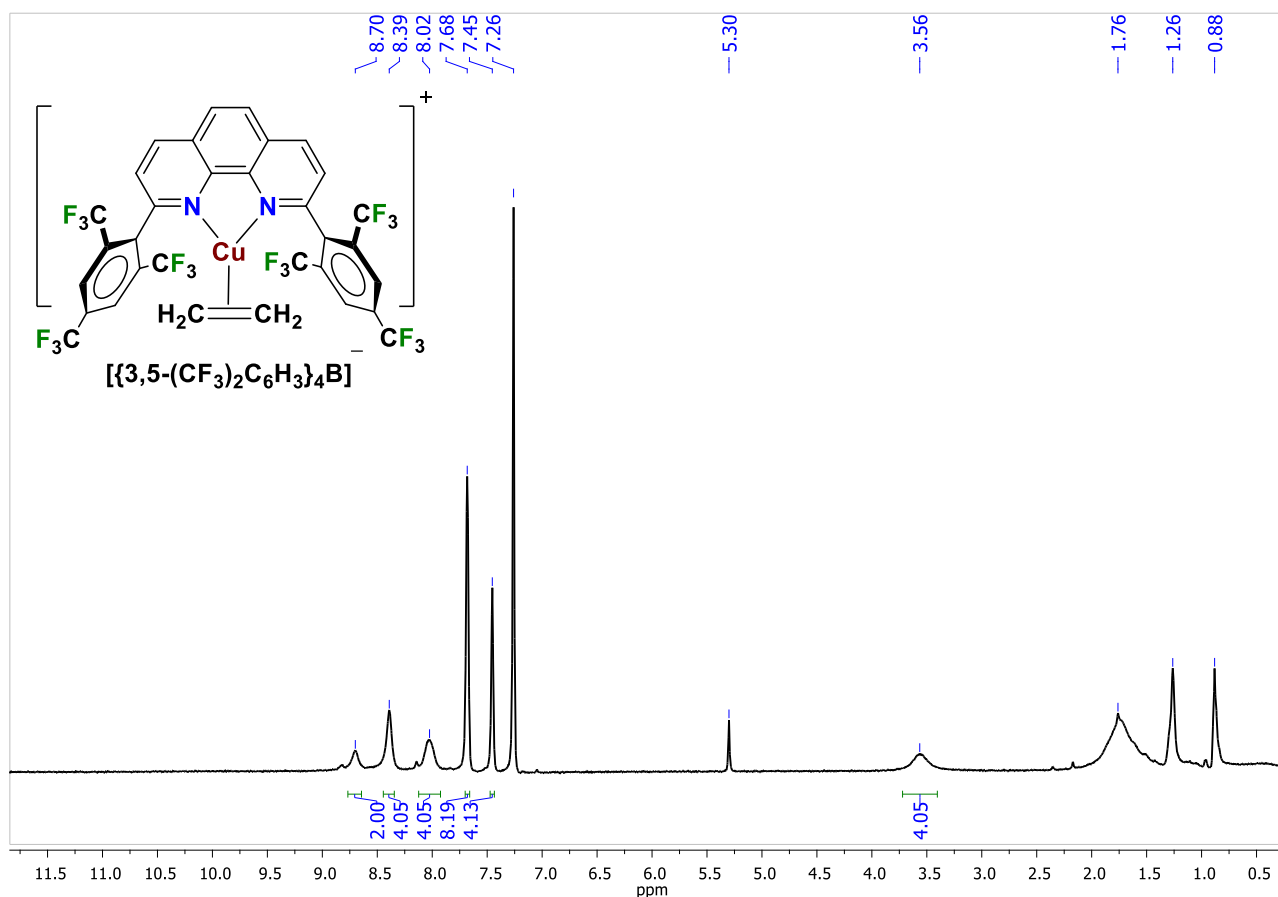

**Figure S7.**  $^1\text{H}$  NMR spectrum of  $[\text{L2Cu}(\text{C}_2\text{H}_4)][\text{BARF}]$  (**4**) in  $\text{CDCl}_3$ . Signal at 1.76 ppm belongs to some moisture present in  $\text{CDCl}_3$ . Signal at 1.26 and 0.88 ppm belong to some grease present in the sample.

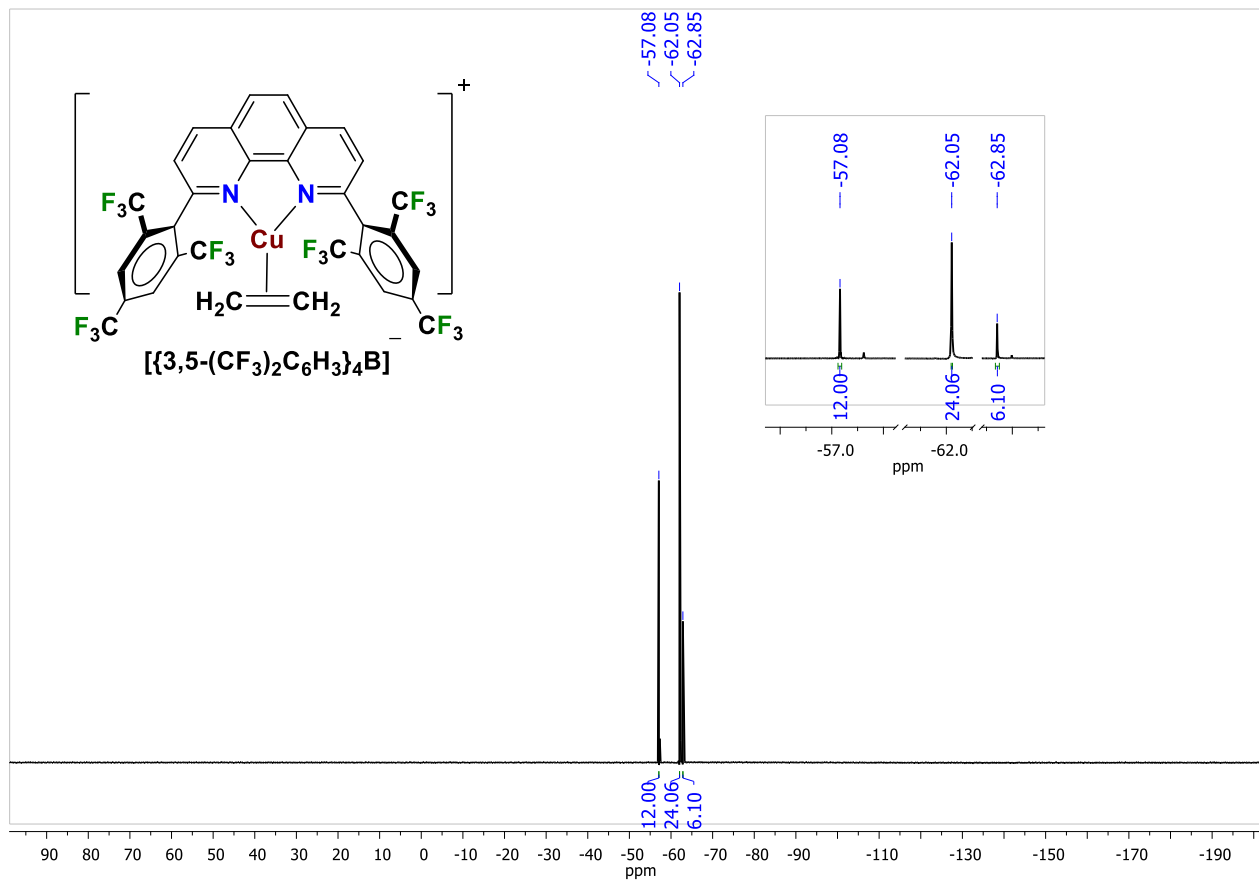

**Figure S8.**  $^{19}\text{F}$  NMR spectrum of  $[\text{L2Cu}(\text{C}_2\text{H}_4)]^+[\text{BArF}]^-$  (**4**) in  $\text{CDCl}_3$ . Tiny peaks present near  $-57.08$  ppm and  $-62.85$  ppm correspond to very small amount of unreacted ligand.

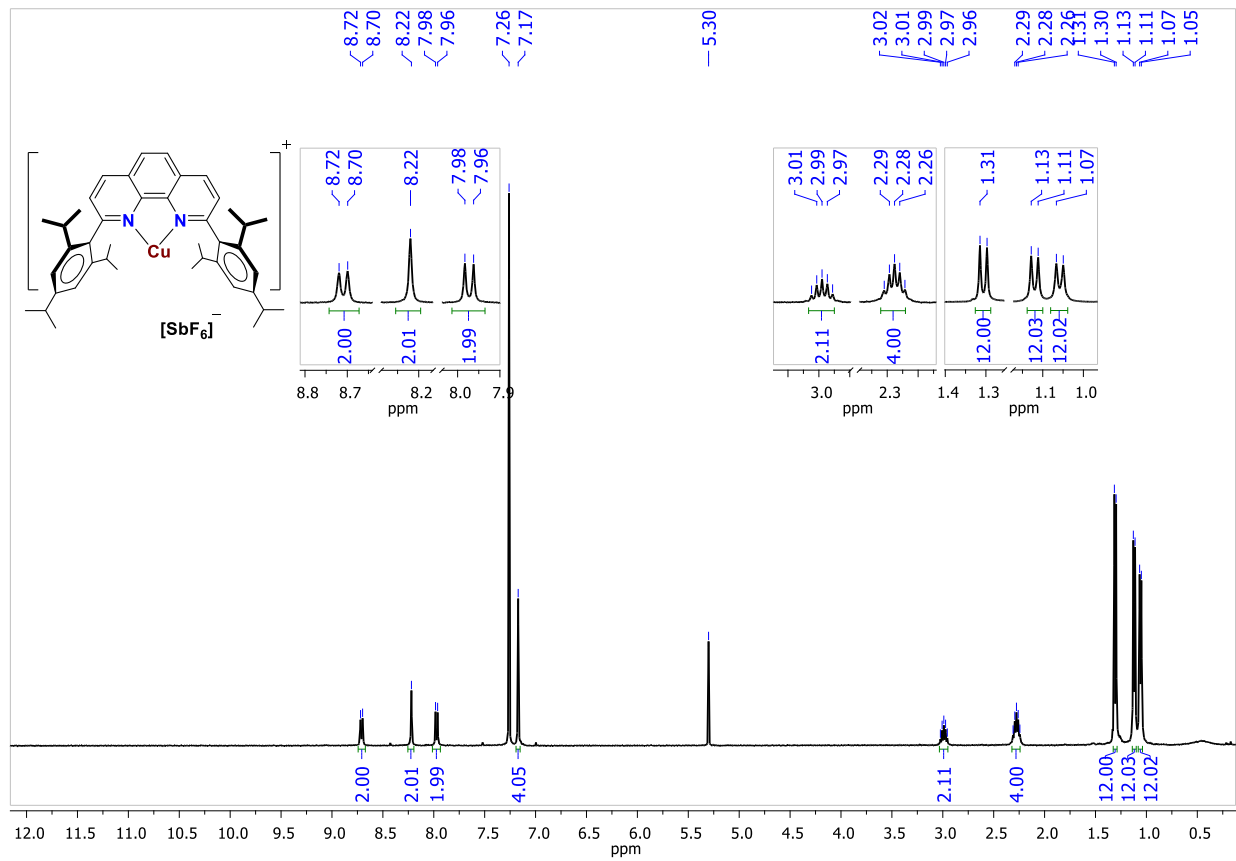

**Figure S9.**  $^1\text{H}$  NMR spectrum of  $[\text{L1Cu}][\text{SbF}_6]$  in  $\text{CDCl}_3$

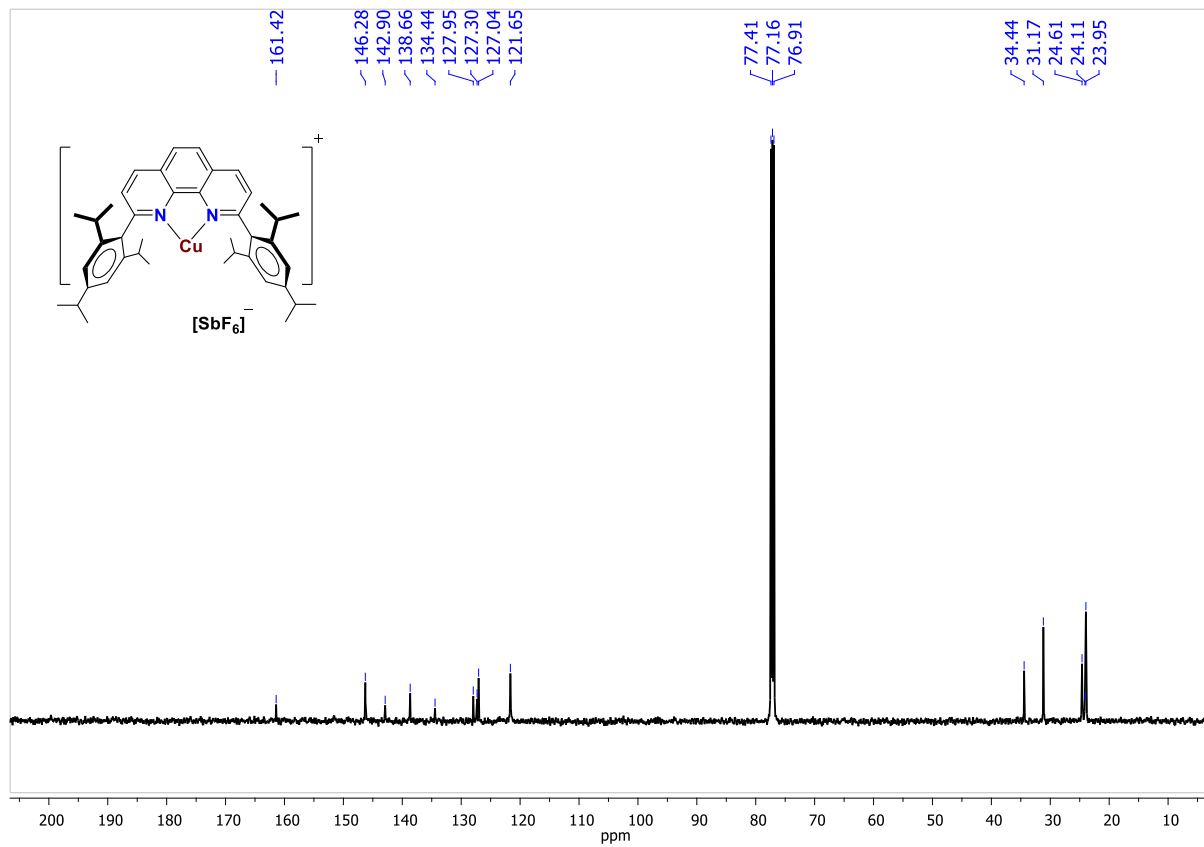

**Figure S10.** <sup>13</sup>C{<sup>1</sup>H} NMR spectrum of [L1Cu][SbF<sub>6</sub>] in CDCl<sub>3</sub>

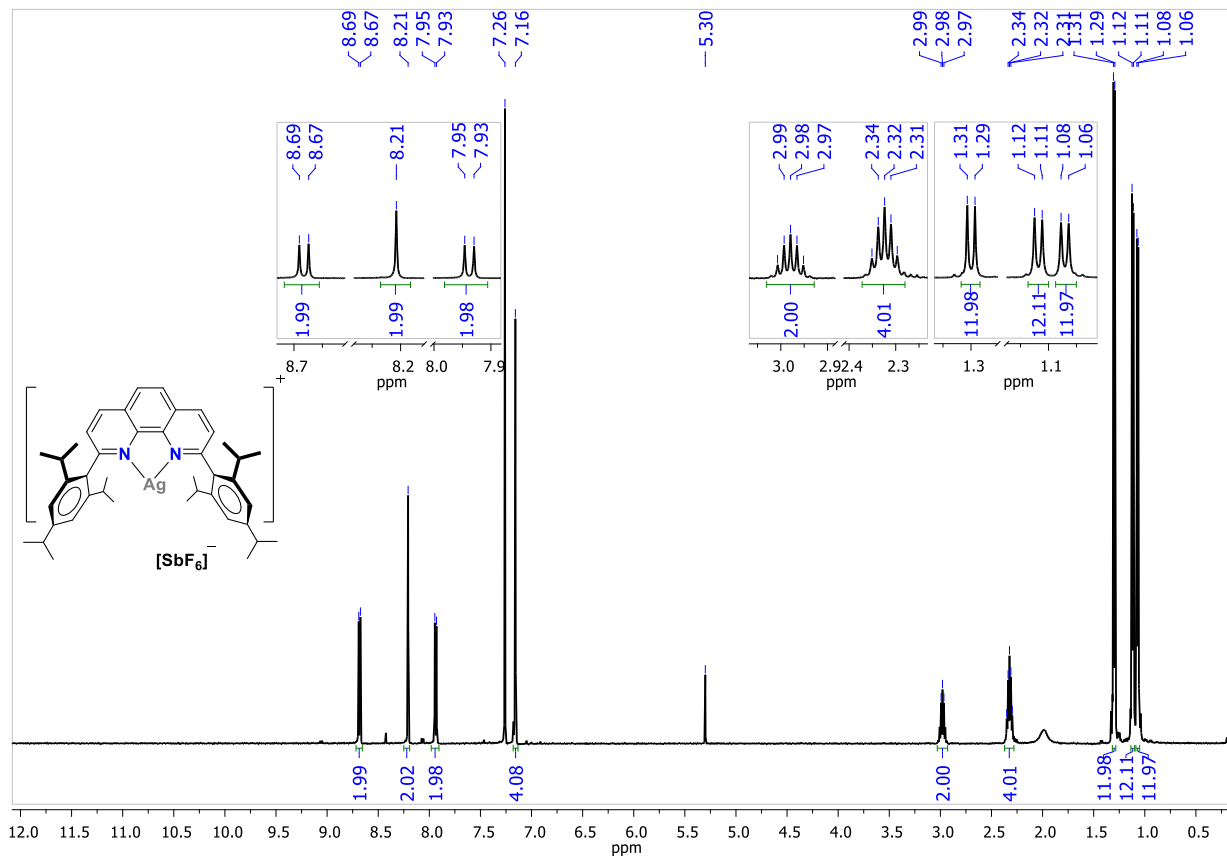

Figure S11.  $^1\text{H}$  NMR spectrum of  $[\text{L1Ag}][\text{SbF}_6]$  in  $\text{CDCl}_3$

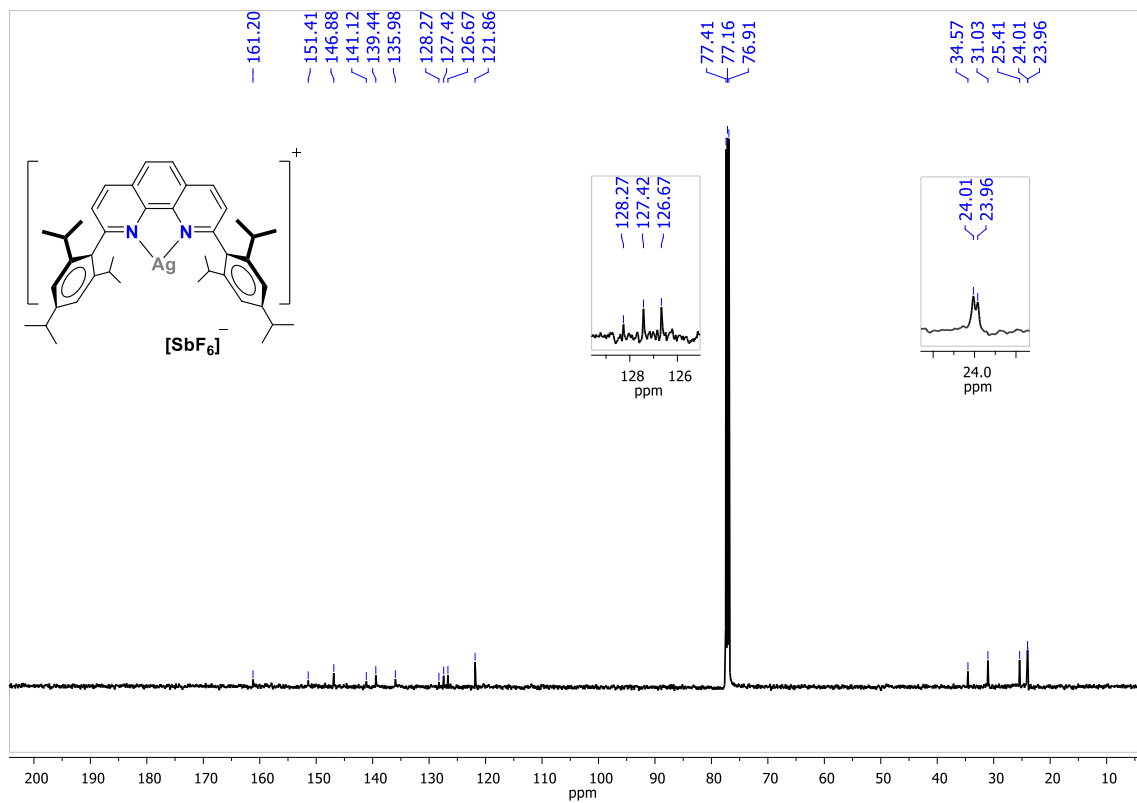

**Figure S12.**  $^{13}C\{^1H\}$  NMR spectrum of  $[L1Ag][SbF_6]$  in  $CDCl_3$

**Table S3.** Crystal data and structure refinement for [L1Cu(C<sub>2</sub>H<sub>4</sub>)] [SbF<sub>6</sub>]•CH<sub>2</sub>Cl<sub>2</sub>.

|                                    |                                                                                    |
|------------------------------------|------------------------------------------------------------------------------------|
| Identification code                | dia94_0m_a                                                                         |
| Empirical formula                  | C <sub>45</sub> H <sub>58</sub> Cl <sub>2</sub> CuF <sub>6</sub> N <sub>2</sub> Sb |
| Formula weight                     | 997.12                                                                             |
| Temperature/K                      | 99.98                                                                              |
| Crystal system                     | triclinic                                                                          |
| Space group                        | P-1                                                                                |
| a/Å                                | 9.1342(9)                                                                          |
| b/Å                                | 12.9011(12)                                                                        |
| c/Å                                | 19.4966(19)                                                                        |
| α/°                                | 88.4970(10)                                                                        |
| β/°                                | 87.2490(10)                                                                        |
| γ/°                                | 78.8350(10)                                                                        |
| Volume/Å <sup>3</sup>              | 2251.1(4)                                                                          |
| Z                                  | 2                                                                                  |
| ρ <sub>calc</sub> /cm <sup>3</sup> | 1.471                                                                              |
| μ/mm <sup>-1</sup>                 | 1.249                                                                              |
| F(000)                             | 1020.0                                                                             |
| Crystal size/mm <sup>3</sup>       | 0.355 × 0.146 × 0.132                                                              |
| Radiation                          | Mo Kα (λ = 0.71073)                                                                |
| 2θ range for data collection/°     | 3.218 to 61.078                                                                    |



|                                             |                                                                |
|---------------------------------------------|----------------------------------------------------------------|
| Index ranges                                | -12 ≤ h ≤ 13, -18 ≤ k ≤ 18, -27 ≤ l ≤ 27                       |
| Reflections collected                       | 26077                                                          |
| Independent reflections                     | 12957 [R <sub>int</sub> = 0.0208, R <sub>sigma</sub> = 0.0352] |
| Data/restraints/parameters                  | 12957/253/636                                                  |
| Goodness-of-fit on F <sup>2</sup>           | 1.046                                                          |
| Final R indexes [I ≥ 2σ (I)]                | R <sub>1</sub> = 0.0530, wR <sub>2</sub> = 0.1525              |
| Final R indexes [all data]                  | R <sub>1</sub> = 0.0688, wR <sub>2</sub> = 0.1650              |
| Largest diff. peak/hole / e Å <sup>-3</sup> | 1.63/-1.61                                                     |

**Table S4.** Crystal data and structure refinement for [L1Ag(C<sub>2</sub>H<sub>4</sub>)] [SbF<sub>6</sub>].

|                                    |                                                                    |
|------------------------------------|--------------------------------------------------------------------|
| Identification code                | dia105_0m_a                                                        |
| Empirical formula                  | C <sub>44</sub> H <sub>56</sub> AgF <sub>6</sub> N <sub>2</sub> Sb |
| Formula weight                     | 956.52                                                             |
| Temperature/K                      | 100.28                                                             |
| Crystal system                     | monoclinic                                                         |
| Space group                        | C2/c                                                               |
| a/Å                                | 12.259(4)                                                          |
| b/Å                                | 24.606(9)                                                          |
| c/Å                                | 15.700(6)                                                          |
| α/°                                | 90                                                                 |
| β/°                                | 99.591(5)                                                          |
| γ/°                                | 90                                                                 |
| Volume/Å <sup>3</sup>              | 4670(3)                                                            |
| Z                                  | 4                                                                  |
| ρ <sub>calc</sub> /cm <sup>3</sup> | 1.361                                                              |
| μ/mm <sup>-1</sup>                 | 1.051                                                              |
| F(000)                             | 1944.0                                                             |
| Crystal size/mm <sup>3</sup>       | 0.257 × 0.178 × 0.16                                               |
| Radiation                          | Mo Kα (λ = 0.71073)                                                |
| 2θ range for data collection/°     | 3.31 to 61.994                                                     |

|                                                |                                                               |
|------------------------------------------------|---------------------------------------------------------------|
| Index ranges                                   | $-16 \leq h \leq 17, -35 \leq k \leq 34, -22 \leq l \leq 21$  |
| Reflections collected                          | 27107                                                         |
| Independent reflections                        | 6998 [ $R_{\text{int}} = 0.0427, R_{\text{sigma}} = 0.0412$ ] |
| Data/restraints/parameters                     | 6998/15/288                                                   |
| Goodness-of-fit on $F^2$                       | 1.060                                                         |
| Final R indexes [ $I \geq 2\sigma(I)$ ]        | $R_1 = 0.0305, wR_2 = 0.0687$                                 |
| Final R indexes [all data]                     | $R_1 = 0.0405, wR_2 = 0.0724$                                 |
| Largest diff. peak/hole / $e \text{ \AA}^{-3}$ | 0.59/-0.61                                                    |

**Table S5.** Crystal data and structure refinement for [L1Au(C<sub>2</sub>H<sub>4</sub>)] [SbF<sub>6</sub>]•CH<sub>2</sub>Cl<sub>2</sub>.

|                                    |                                                                                    |
|------------------------------------|------------------------------------------------------------------------------------|
| Identification code                | HRD64_0m_a                                                                         |
| Empirical formula                  | C <sub>45</sub> H <sub>58</sub> AuCl <sub>2</sub> F <sub>6</sub> N <sub>2</sub> Sb |
| Formula weight                     | 1130.55                                                                            |
| Temperature/K                      | 100.00                                                                             |
| Crystal system                     | orthorhombic                                                                       |
| Space group                        | Pna2 <sub>1</sub>                                                                  |
| a/Å                                | 30.8326(8)                                                                         |
| b/Å                                | 22.8905(6)                                                                         |
| c/Å                                | 13.0504(3)                                                                         |
| α/°                                | 90                                                                                 |
| β/°                                | 90                                                                                 |
| γ/°                                | 90                                                                                 |
| Volume/Å <sup>3</sup>              | 9210.6(4)                                                                          |
| Z                                  | 8                                                                                  |
| ρ <sub>calc</sub> /cm <sup>3</sup> | 1.631                                                                              |
| μ/mm <sup>-1</sup>                 | 3.941                                                                              |
| F(000)                             | 4480.0                                                                             |
| Crystal size/mm <sup>3</sup>       | 0.11 × 0.1 × 0.08                                                                  |
| Radiation                          | Mo Kα (λ = 0.71073)                                                                |
| 2θ range for data collection/°     | 5.328 to 63.01                                                                     |

|                                                |                                                                |
|------------------------------------------------|----------------------------------------------------------------|
| Index ranges                                   | $-44 \leq h \leq 45, -33 \leq k \leq 33, -19 \leq l \leq 19$   |
| Reflections collected                          | 165465                                                         |
| Independent reflections                        | 30564 [ $R_{\text{int}} = 0.0289, R_{\text{sigma}} = 0.0234$ ] |
| Data/restraints/parameters                     | 30564/1/1052                                                   |
| Goodness-of-fit on $F^2$                       | 1.045                                                          |
| Final R indexes [ $I \geq 2\sigma(I)$ ]        | $R_1 = 0.0216, wR_2 = 0.0439$                                  |
| Final R indexes [all data]                     | $R_1 = 0.0237, wR_2 = 0.0444$                                  |
| Largest diff. peak/hole / $e \text{ \AA}^{-3}$ | 1.16/-0.98                                                     |
| Flack parameter                                | 0.489(2)                                                       |

**Table S6.** Crystal data and structure refinement for [L2Cu(C2H4)] [{3,5-(CF3)2C6H3}4B] •CH2Cl2.

|                                    |                     |
|------------------------------------|---------------------|
| Identification code                | HRD132_0m_a         |
| Empirical formula                  | C65H28BCl2CuF42N2   |
| Formula weight                     | 1780.14             |
| Temperature/K                      | 100.00              |
| Crystal system                     | triclinic           |
| Space group                        | P-1                 |
| a/Å                                | 14.4451(4)          |
| b/Å                                | 14.7271(4)          |
| c/Å                                | 17.4381(4)          |
| α/°                                | 79.7320(10)         |
| β/°                                | 73.2900(10)         |
| γ/°                                | 79.6100(10)         |
| Volume/Å <sup>3</sup>              | 3463.18(16)         |
| Z                                  | 2                   |
| ρ <sub>calc</sub> /cm <sup>3</sup> | 1.707               |
| μ/mm <sup>-1</sup>                 | 0.549               |
| F(000)                             | 1756.0              |
| Crystal size/mm <sup>3</sup>       | 0.344 × 0.32 × 0.16 |
| Radiation                          | Mo Kα (λ = 0.71073) |

|                                             |                                                                        |
|---------------------------------------------|------------------------------------------------------------------------|
| 2 $\theta$ range for data collection/°      | 5.676 to 61.038                                                        |
| Index ranges                                | -20 $\leq$ h $\leq$ 20, -21 $\leq$ k $\leq$ 20, -24 $\leq$ l $\leq$ 24 |
| Reflections collected                       | 58212                                                                  |
| Independent reflections                     | 20956 [R <sub>int</sub> = 0.0214, R <sub>sigma</sub> = 0.0245]         |
| Data/restraints/parameters                  | 20956/54/1046                                                          |
| Goodness-of-fit on F <sup>2</sup>           | 1.042                                                                  |
| Final R indexes [I $\geq$ 2 $\sigma$ (I)]   | R <sub>1</sub> = 0.0473, wR <sub>2</sub> = 0.1255                      |
| Final R indexes [all data]                  | R <sub>1</sub> = 0.0558, wR <sub>2</sub> = 0.1306                      |
| Largest diff. peak/hole / e Å <sup>-3</sup> | 1.06/-1.42                                                             |

### Photoluminescence studies:

**Experimental procedure:** The  $1 \times 10^{-3}$  M to  $1.5 \times 10^{-3}$  M stock solutions of the compound of interest were prepared in anhydrous dichloromethane under nitrogen. These solutions were diluted to  $4 \times 10^{-4}$  M solution for data collection. The photoluminescence studies were done under nitrogen.

**Table S7.** Comparison of photoluminescence data of **1-4** complexes, [L1Cu][SbF<sub>6</sub>] and [L1Ag][SbF<sub>6</sub>] in dichloromethane ( $4 \times 10^{-4}$  M solution) at 360 nm.

| Complex                                                                 | Emission wavelength, $\lambda_{\max}$ (nm) |
|-------------------------------------------------------------------------|--------------------------------------------|
| [L1Cu(C <sub>2</sub> H <sub>4</sub> )] [SbF <sub>6</sub> ] ( <b>1</b> ) | 502                                        |
| [L1Ag(C <sub>2</sub> H <sub>4</sub> )] [SbF <sub>6</sub> ] ( <b>2</b> ) | 490                                        |
| [L1Au(C <sub>2</sub> H <sub>4</sub> )] [SbF <sub>6</sub> ] ( <b>3</b> ) | 487                                        |
| [L2Cu(C <sub>2</sub> H <sub>4</sub> )] [BArF] ( <b>4</b> )              | 428, 544 (sh)                              |
| [L1Cu][SbF <sub>6</sub> ]                                               | 497                                        |
| [L1Ag][SbF <sub>6</sub> ]                                               | 495                                        |



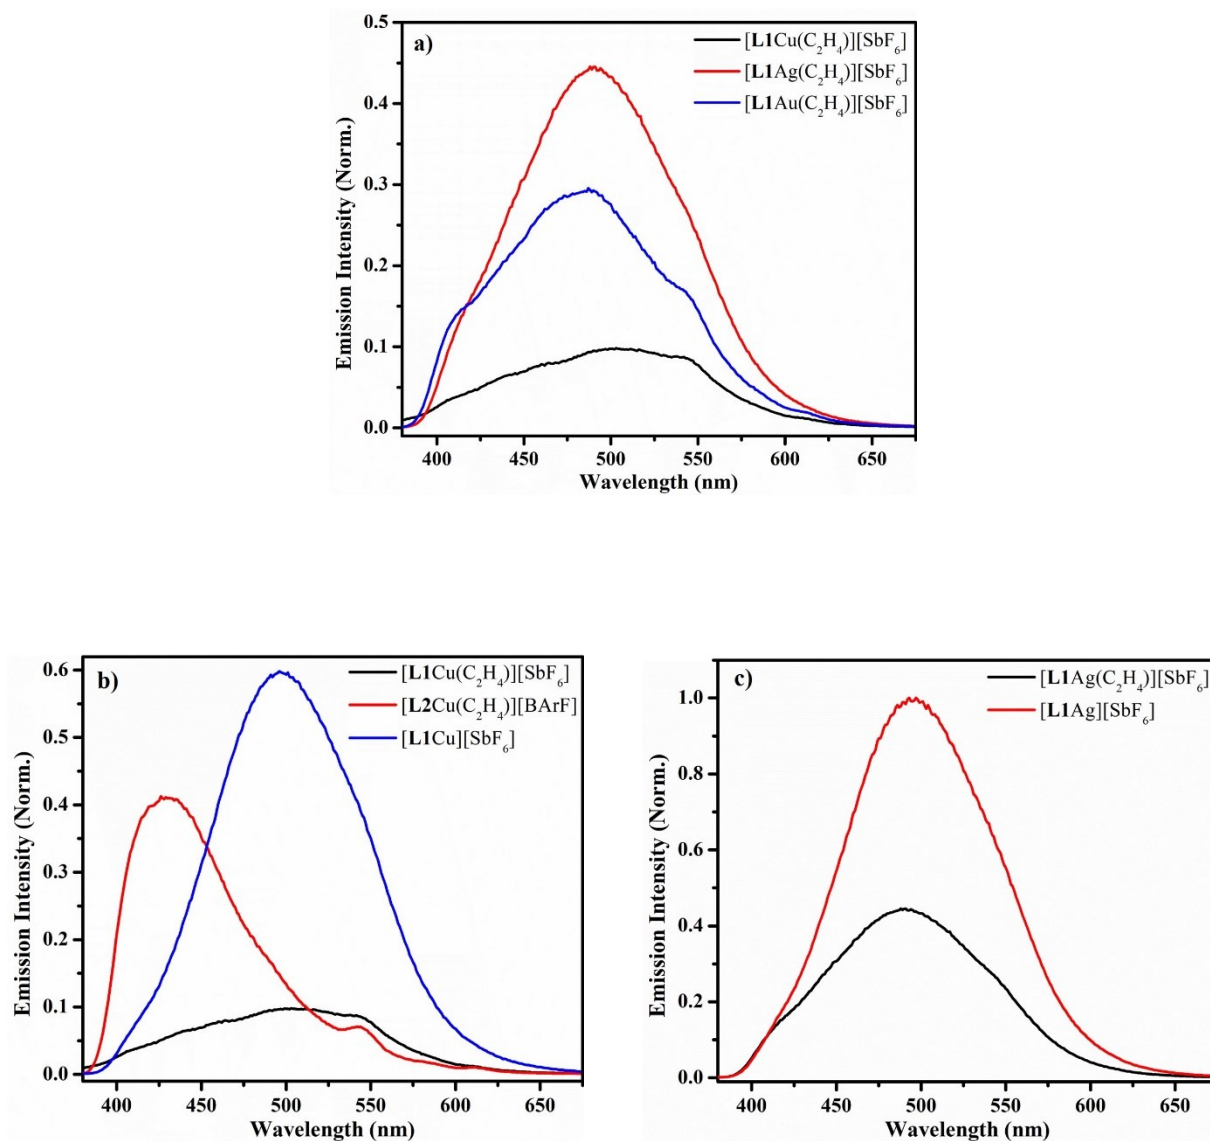

**Figure S13.** Emission spectra acquired for (a) compounds **1-3** ( $[\text{L1M}(\text{C}_2\text{H}_4)][\text{SbF}_6]$  ( $\text{M} = \text{Cu}$  (**1**),  $\text{Ag}$  (**2**),  $\text{Au}$  (**3**)) (b) compounds  $[\text{L1Cu}(\text{C}_2\text{H}_4)][\text{SbF}_6]$  (**1**),  $[\text{L2Cu}(\text{C}_2\text{H}_4)][\text{BArF}]$  (**4**) and  $[\text{L1Cu}][\text{SbF}_6]$  (c) compound  $[\text{L1Ag}(\text{C}_2\text{H}_4)][\text{SbF}_6]$  (**2**) and  $[\text{L1Ag}][\text{SbF}_6]$  in dichloromethane ( $4 \times 10^{-4}$  M) by photoexcitation at 360 nm.

## References.

1. Munakata, M.; Kitagawa, S.; Kosome, S.; Asahara, A. Studies of Copper(I) Olefin Complexes. Formation Constants of Copper Olefin Complexes with 2,2'-Bipyridine, 1,10-Phenanthroline, and Their Derivatives. *Inorg. Chem.* **1986**, *25* (15), 2622–2627.
2. Yang, Y.; Antoni, P.; Zimmer, M.; Sekine, K.; Mulks, F. F.; Hu, L.; Zhang, L.; Rudolph, M.; Rominger, F.; Hashmi, A. S. K. Dual Gold/Silver Catalysis Involving Alkynylgold(III) Intermediates Formed by Oxidative Addition and Silver-Catalyzed C–H Activation for the Direct Alkynylation of Cyclopropenes. *Angew. Chem., Int. Ed.* **2019**, *58* (15), 5129–5133.
3. Masuda, H.; Yamamoto, N.; Taga, T.; Machida, K.; Kitagawa, S.; Munakata, M. Structural Studies of Copper(I) Complexes with Ethylene. Crystal Structures of [Cu(2,2'-Bipyridine)(Ethylene)]ClO<sub>4</sub> and [Cu(1,10-Phenanthroline)(Ethylene)]ClO<sub>4</sub>. *J. Organomet. Chem.* **1987**, *322* (1), 121–129.
